# Supplementary material
Source: PubMed Central journal article supplement (PMC6588069)
Supplement: CONC-26-e398-s001.pdf [file CONC-26-e398-s001.pdf]

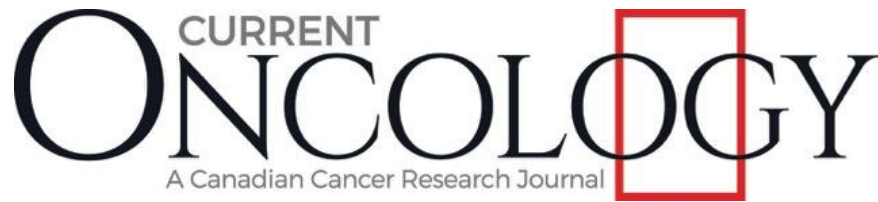

## **Supplemental Materials for**

### **Surgery after chemoradiotherapy in patients with stage III (N2 or N3, excluding T4) non-small cell lung cancer: a systematic review**

Anand Swaminath MD, E.T. Vella PhD, K. Ramchandar MD, A. Robinson MD, C. Simone MD, A. Sun MD, Y.C. Ung MD, K. Yasufuku MD, P.M. Ellis MBBS, PhD

#### **Listing of Supplemental Material(s):**

Supplemental Appendix 1: Literature Search Strategy

**Supplemental Appendix 1: Literature Search Strategy**

Database(s): Embase 1996 to 2016 Week 19, Ovid MEDLINE(R) In-Process & Other Non-Indexed Citations and Ovid MEDLINE(R) 1946 to Present

Search Strategy: on October 20, 2016

| #  | Searches                                                                                                                                                                                                                                                                                                                                                                                                                                                                                                                                                                                                                                                                                                                                                                                                                                                                                                                                                                                                                                                                                                                                                                                                                                                                                                                                    |
|----|---------------------------------------------------------------------------------------------------------------------------------------------------------------------------------------------------------------------------------------------------------------------------------------------------------------------------------------------------------------------------------------------------------------------------------------------------------------------------------------------------------------------------------------------------------------------------------------------------------------------------------------------------------------------------------------------------------------------------------------------------------------------------------------------------------------------------------------------------------------------------------------------------------------------------------------------------------------------------------------------------------------------------------------------------------------------------------------------------------------------------------------------------------------------------------------------------------------------------------------------------------------------------------------------------------------------------------------------|
| 1  | exp lung neoplasms/                                                                                                                                                                                                                                                                                                                                                                                                                                                                                                                                                                                                                                                                                                                                                                                                                                                                                                                                                                                                                                                                                                                                                                                                                                                                                                                         |
| 2  | exp lung cancer/                                                                                                                                                                                                                                                                                                                                                                                                                                                                                                                                                                                                                                                                                                                                                                                                                                                                                                                                                                                                                                                                                                                                                                                                                                                                                                                            |
| 3  | NSCLC.mp.                                                                                                                                                                                                                                                                                                                                                                                                                                                                                                                                                                                                                                                                                                                                                                                                                                                                                                                                                                                                                                                                                                                                                                                                                                                                                                                                   |
| 4  | ((lung or thorax or thoracic or pulmonary) adj3 (cancer\$ or neoplasm\$ or carcinom\$ or malignan\$ or tumo?r\$ or adenocarcinoma\$ or metastas\$)).mp.                                                                                                                                                                                                                                                                                                                                                                                                                                                                                                                                                                                                                                                                                                                                                                                                                                                                                                                                                                                                                                                                                                                                                                                     |
| 5  | or/1-4                                                                                                                                                                                                                                                                                                                                                                                                                                                                                                                                                                                                                                                                                                                                                                                                                                                                                                                                                                                                                                                                                                                                                                                                                                                                                                                                      |
| 6  | limit 5 to yr="2011-current"                                                                                                                                                                                                                                                                                                                                                                                                                                                                                                                                                                                                                                                                                                                                                                                                                                                                                                                                                                                                                                                                                                                                                                                                                                                                                                                |
| 7  | (radiotherap\$ or radiation\$ or irradiat\$ or platin\$ or cisplatin\$ or platamin\$ or neoplatin\$ or cismaplat\$ or CDDP or carboplatin\$ or paraplatin\$).mp.                                                                                                                                                                                                                                                                                                                                                                                                                                                                                                                                                                                                                                                                                                                                                                                                                                                                                                                                                                                                                                                                                                                                                                            |
| 8  | exp radiotherapy/ or exp cisplatin/ or exp carboplatin/                                                                                                                                                                                                                                                                                                                                                                                                                                                                                                                                                                                                                                                                                                                                                                                                                                                                                                                                                                                                                                                                                                                                                                                                                                                                                     |
| 9  | or/7-8                                                                                                                                                                                                                                                                                                                                                                                                                                                                                                                                                                                                                                                                                                                                                                                                                                                                                                                                                                                                                                                                                                                                                                                                                                                                                                                                      |
| 10 | exp phase 3 clinical trial/ or exp "phase 3 clinical trial (topic)"/ or exp clinical trial, phase iii/ or exp clinical trials, phase iii as topic/ or exp phase 4 clinical trial/ or exp "phase 4 clinical trial (topic)"/ or exp clinical trial, phase iv/ or exp clinical trials, phase iv as topic/ or exp randomized controlled trial/ or exp "randomized controlled trial (topic)"/ or exp controlled clinical trial/ or exp randomized controlled trials as topic/ or exp randomization/ or exp random allocation/ or exp double-blind method/ or exp single-blind method/ or exp double blind procedure/ or exp single blind procedure/ or exp triple blind procedure/ or exp placebos/ or exp placebo/ or ((exp phase 2 clinical trial/ or exp "phase 2 clinical trial (topic)"/ or exp clinical trial, phase ii/ or exp clinical trials, phase ii as topic/ or exp clinical trial/ or exp prospective study/ or exp controlled clinical trial/) and random\$.tw.) or (((phase II or phase 2 or clinic\$) adj3 trial\$) and random\$.tw. or ((singl\$ or double\$ or treple\$ or tripl\$) adj3 (blind\$ or mask\$ or dummy)).tw. or placebo?.tw. or (allocat: adj2 random:).tw. or (random\$ control\$ trial? or rct or phase III or phase IV or phase 3 or phase 4).tw. or (random\$ adj3 trial\$).mp. or "clinicaltrials.gov".mp. |
| 11 | exp meta analysis/ or exp "meta analysis (topic)"/ or exp meta-analysis as topic/ or exp "systematic review"/ or exp "systematic review (topic)"/ or ((exp "review"/ or exp "review literature as topic"/ or review.pt.) and ((systematic or selection criteria or data extraction or quality assessment or jaded scale or methodologic\$ quality or study) adj selection).tw.) or meta-analysis.mp. or (meta-analy: or metaanaly: or meta analy:).tw. or (systematic review or systematic overview).mp. or ((cochrane or medline or embase or cancerlit or hand search\$ or hand-search\$ or manual search\$ or reference list\$ or bibliograph\$ or relevant journal\$ or pooled analys\$ or statistical pooling or mathematical pooling or statistical summar\$ or mathematical summar\$ or quantitative synthes?s or quantitative overview\$ or systematic) adj2 (review\$ or overview\$)).tw. or (medline or med-line or pubmed or pub-med or embase or cochrane or cancerlit).ab.                                                                                                                                                                                                                                                                                                                                                     |
| 12 | exp evidence based practice/ or exp practice guideline/ or exp consensus development conference/ or guideline.pt. or practice parameter\$.tw. or practice guideline\$.mp. or (guideline: or recommend: or consensus or standards).ti. or (guideline: or recommend: or consensus or standards).kw.                                                                                                                                                                                                                                                                                                                                                                                                                                                                                                                                                                                                                                                                                                                                                                                                                                                                                                                                                                                                                                           |

|    |                                                                                                                                                                        |
|----|------------------------------------------------------------------------------------------------------------------------------------------------------------------------|
| 13 | or/10-12                                                                                                                                                               |
| 14 | 6 and 9 and 13                                                                                                                                                         |
| 15 | animal/ not (exp human/ or humans/)                                                                                                                                    |
| 16 | 14 not 15                                                                                                                                                              |
| 17 | limit 16 to english language                                                                                                                                           |
| 18 | (comment or letter or editorial or note or erratum or short survey or news or newspaper article or patient education handout or case report or historical article).pt. |
| 19 | (editorial or note or letter erratum or short survey).pt. or abstract report/ or letter/ or case study/                                                                |
| 20 | 18 or 19                                                                                                                                                               |
| 21 | 17 not 20                                                                                                                                                              |
| 22 | limit 21 to yr="2011 - 2013"                                                                                                                                           |
| 23 | limit 21 to yr="2014 -Current"                                                                                                                                         |
| 24 | remove duplicates from 22                                                                                                                                              |
| 25 | remove duplicates from 23                                                                                                                                              |
| 26 | 24 or 25                                                                                                                                                               |

PubMed searched on October 20, 2016

(lung neoplasm OR lung cancer OR lung carcinoma OR lung malignancy OR lung malignancies OR lung malignant OR lung tumour OR lung tumor OR lung adenocarcinoma OR thoracic OR thorax OR pulmonary OR thorac cancer OR adenocarcinoma of lung OR nslc OR lung) AND (radiotherapy OR radiation\$ OR irradiato OR platin\$ OR cisplatin\$ OR platanin OR neoplastic OR cis plat OR cddp OR carboplatin\$ OR paraplatin\$) AND ( ( Clinical Trial[ptyp] OR Clinical Trial, Phase I[ptyp] OR Clinical Trial, Phase II[ptyp] OR Clinical Trial, Phase III[ptyp] OR Clinical Trial, Phase IV[ptyp] OR Controlled Clinical Trial[ptyp] OR Guideline[ptyp] OR Meta-Analysis[ptyp] OR Practice Guideline[ptyp] OR Randomized Controlled Trial[ptyp] OR Review[ptyp] OR systematic[sb] ) AND ( "2016/01/01"[PDat] : "2016/12/31"[PDat] ) AND English[lang])
